## **A Single Dose Of Ayahuasca Modulates Salivary Cortisol In Treatment-Resistant Depression**

Ana Cecília de Menezes Galvão<sup>a,b</sup>, Raíssa Nóbrega de Almeida<sup>a,b</sup>, Erick Allan dos Santos Silva<sup>a</sup>, Fúlvio Aurélio de Moraes Freire<sup>b</sup>, Fernanda Palhano-Fontes<sup>d,e</sup>, Heloisa Onias<sup>d,e</sup>, Emerson Arcoverde<sup>e,g</sup>, João Paulo Maia-de-Oliveira<sup>c,e,g</sup>, Dráulio B Araújo<sup>d,e</sup>, Bruno Lobão-Soares<sup>c,f</sup>, \*Nicole Leite Galvão-Coelho<sup>a,b,c</sup>

<sup>a</sup>Laboratory of Hormone Measurement, Department of Physiology, Federal University of Rio Grande do Norte, Natal, RN, Brazil.

<sup>b</sup>Postgraduate Program in Psychobiology, Federal University of Rio Grande do Norte, Natal, RN, Brazil.

<sup>c</sup>National Institute of Science and Technology in Translational Medicine, Natal, RN, Brazil.

<sup>d</sup>Brain Institute, Federal University of Rio Grande do Norte, Natal, Brazil.

<sup>e</sup>Onofre Lopes University Hospital, Federal University of Rio Grande do Norte, Natal, Brazil.

<sup>f</sup>Department of Biophysics and Pharmacology, Federal University of Rio Grande do Norte, Natal, Brazil.

<sup>g</sup>Department of Clinical Medicine, Federal University of Rio Grande do Norte, Natal, RN, Brazil.

*Running head: Ayahuasca modulates cortisol in depression*

### **Corresponding author:**

Nicole L. Galvão-Coelho  
Universidade Federal do Rio Grande do Norte  
Departamento de Fisiologia  
Caixa Postal, 1511  
59078-970 NATAL, RN, BRAZIL  
Tel 55 84 3215-3410  
Fax 55 84 3211-9206  
E-mail: nicolelgalvaocoelho@gmail.com

Pages: 22

Words: 4803

Tables: 1

Figures: 5

Appendix: 5 (tables) and 2 (figures)

References: 93

Corresponding Author: Nicole Leite Galvão- Coelho

Email: nicolelgalvaocoelho@gmail.com

51 **ABSTRACT**

52

53 Major depression is a highly prevalent mood disorder, affecting about 350 million people,  
54 and around 30% of the patients are resistant to currently available antidepressant  
55 medications. Recent evidence from a randomized placebo-controlled trial supports the  
56 rapid antidepressant effects of the psychedelic ayahuasca in treatment-resistant  
57 depression. The aim of this study was to explore the effect of ayahuasca on plasma  
58 cortisol and awakening salivary cortisol response, in the same group of treatment-resistant  
59 patients and in healthy volunteers. Subjects received a single dose of ayahuasca or  
60 placebo, and both plasma and awakening salivary cortisol response were measured at  
61 baseline (before dosing) and 48h after the dosing session. Baseline assessment (D0)  
62 showed blunted awakening salivary cortisol response and hypocortisolemia in patients  
63 (DM), both with respect to healthy controls group (C). Salivary cortisol also was  
64 measured during dosing session and we observed a large increase for both C and DM  
65 that ingested ayahuasca, than placebo groups. After 48h of the dosing session (D2) with  
66 ayahuasca, awakening salivary cortisol response (for both sexes) of treated patients  
67 became similar to levels detected in controls. This was not observed in patients that  
68 ingested placebo. No changes in plasma cortisol were observed after 48 hours of  
69 ayahuasca or placebo ingestion for both groups and sexes. Therefore, these findings point  
70 to new evidence of modulation of ayahuasca on salivary cortisol levels, as cortisol acts in  
71 regulation of distinct physiological pathways, emotional and cognitive processes related  
72 to etiology of depression, this modulation could be an important part of the antidepressant  
73 effects observed with ayahuasca. Moreover, this study highlights the importance of  
74 psychedelics in the treatment of human mental disorders.

75

76 **Keywords:** ayahuasca, awakening salivary cortisol response, plasma cortisol, treatment-  
77 resistant depression, hypocortisolemia.

78

79

80

81

82

83

84

85

86

87

88

89

90

91

92

93

94

95

96

97

98

99

100

## 101 1 INTRODUCTION

102

103 Major depression is a highly prevalent mood disorder, affecting about 350 million people  
104 worldwide (1). It is more prevalent in women than men and has a huge impact on general  
105 health of the patients (2, 1).

106

107 Major depressive disorder (MDD) has been closely associated with deregulations of the  
108 hypothalamic-pituitary-adrenal (HPA) axis, both at rest and in response to stress (3, 4, 5).  
109 Some studies report changes in cortisol response that occur soon after awakening (6).  
110 Most often reported, cortisol awakening response (CAR) is increased in patients with  
111 major depression suggesting hyperactivity of the HPA axis (7). However, there is  
112 increasing evidence of hypocortisolism in patients with depression, which has been  
113 interpreted as an indication of HPA axis fatigueness in response to recurrent depressive  
114 episodes (8, 9). Such discrepancies can be attributed to a number of factors including  
115 subtypes of depression, depression severity, sex, duration of illness and socioeconomic  
116 status (10, 11, 12, 13).

117

118 Cortisol assessments have also served as an important biomarker of treatment response.  
119 For instance, patients with depression who responded to an 8-week treatment with  
120 fluoxetine, a selective serotonin reuptake inhibitor, presented decreased levels of cortisol  
121 (14). At present, the large majority of currently available antidepressants take about two  
122 weeks for the beginning of their therapeutic effects (15, 16, 17, 18).

123

124 Recently, however, psychedelics have been emerging as a promising fast-acting  
125 antidepressant (19, 20, 21, 22, 23). Clinical trials have pointed to a positive effect of  
126 psychedelics in depression. A recent open label trial in treatment-resistant depression  
127 observed a reduction of up to 87% in depression severity, already at 24h after a single  
128 dosing session with ayahuasca (24, 23). Ayahuasca was originally used for medicinal  
129 purposes by indigenous populations groups in Brazil, Ecuador, Peru and Colombia, and  
130 later its ritualistic use became more popular by its presence in ceremonies of different  
131 syncretic churches in Brazil, which is currently spreading to other parts of the world (25).

132

133 Ayahuasca is a decoction of a mixture of two plants: *Psychotria viridis* and *Banisteriopsis*  
134 *caapi* (26). *P. viridis* contains the psychedelic tryptamine N,N-dimethyltryptamine (N,N-  
135 DMT), whose action is mediated by serotonin (5-HT<sub>2A</sub>) and sigma-1 receptors (27, 28,  
136 29, 30). *B. caapi* contains  $\beta$ -carbolinic alkaloids (harmaline, harmine and  
137 tetrahydroharmine), which work as indirect monoaminergic agonist due to the inhibition  
138 of monoamine oxidase isoenzyme (MAO) (31, 32, 33). Regular users of ayahuasca in  
139 religious contexts have shown low level of psychopathologies (34, 35), low scores on the  
140 state scales related to panic and hopelessness (36) as well as good performances in  
141 cognitive neuropsychological tests (37, 38). Moreover, this brew does not exhibit dose  
142 tolerance, i.e., the decrease of the effect of a drug or medication by excessive or frequent  
143 exposure of the patient to its active principle, and is not addictive (39, 40, 41).

144

145 Considering that the main neurobiological actions of ayahuasca are strongly related to  
146 key physiological systems altered in major depression, and taking into account the low  
147 incidence of mental disorders in regular users in religious context, and previous results  
148 from open label trial (23), we recently conducted a randomized placebo-controlled trial  
149 with ayahuasca in patients with treatment-resistant depression. Our results suggest  
150 significant and rapid reduction in depressive symptom one day after a single ayahuasca

151 dose, when compared to placebo (42). Herein, we explored the effects of ayahuasca on  
152 the salivary cortisol awakening response and plasma cortisol, in patients with treatment-  
153 resistant depression and in healthy individuals.

154

155 Our hypotheses are that patients and controls will show, in baseline, different levels of  
156 plasma cortisol and awakening salivary cortisol response and the cortisol levels in patients  
157 will be correlated with severity and/or duration of disease. Moreover, ayahuasca, but not  
158 placebo, will increase cortisol levels acutely (43), during dosing session and after 48 hours  
159 of its ingestion in volunteers patients and control, but with different intensity. The  
160 responses will be correlated with improvement in depression symptoms in patients group  
161 (42).

162

## 163 **2 METHODS**

164

165 This is a randomized double-blinded placebo-controlled trial using a parallel arm design.  
166 Patients were referred from psychiatric units of the Onofre Lopes University Hospital, in  
167 Natal/RN, Brazil, and through media and internet advertisements. All procedures took  
168 place at the University Hospital. The study was approved by the Research Ethics  
169 Committee of the University Hospital (# 579.479; see supplementary material), and all  
170 subjects provided written informed consent prior to participation. This study is registered  
171 in <http://clinicaltrials.gov> (NCT02914769).

172

### 173 **2.1 Volunteers**

174

175 Seventy-one volunteers participated in the study: 43 healthy volunteers, control group  
176 (C), (19 men and 24 women) without history or diagnosis of major illness or psychiatric  
177 disorders, and 28 patients, major depression (DM), (7 men and 21 women) with  
178 treatment-resistant depression, defined as those with inadequate responses to at least two  
179 antidepressants from different classes (44). Patients were screened for exclusion due to  
180 previous experience with ayahuasca, current medical disease based on history, pregnancy,  
181 current or previous history of neurological disorders, history of schizophrenia or bipolar  
182 affective disorder, history of mania or hypomania, use of substances of abuse, and suicidal  
183 risk. Selected patients were in a current moderate to severe depressive episode at  
184 screening by the Hamilton Depression Rating Scale (HAM-D $\geq$ 17). Depressive symptoms  
185 were monitored at baseline and two days after the dosing session by a clinical scale  
186 traditionally used to measure depression severity: the Montgomery-Åsberg Depression  
187 Rating Scale (MADRS). All patients were not using any antidepressant medication during  
188 the trial, however they all were under regular use of benzodiazepines.

189

190 Volunteers from both groups (healthy and patients) were randomly assigned (1:1) to  
191 receive ayahuasca or placebo using 10-gauge blocks. Half of the patients and half of the  
192 controls received ayahuasca while the other half received placebo. All investigators and  
193 patients were blinded to the intervention assignment.

194

### 195 **2.2 Ayahuasca and placebo**

196

197 The substance used as placebo did not have psychoactive properties, but induced a light  
198 gastrointestinal discomfort, and simulated some organoleptic properties of ayahuasca. It  
199 is a brown liquid with a bitter and sour taste. It contained water, yeast, citric acid, zinc  
200 sulfate and a caramel dye.

201  
202  
203  
204  
205  
206  
207  
208  
209  
210  
211  
212  
213  
214  
215  
216  
217  
218  
219  
220  
221  
222  
223  
224  
225  
226  
227  
228  
229  
230  
231  
232  
233  
234  
235  
236  
237  
238

A single batch of ayahuasca was used throughout the study. It was prepared and supplied free of charge by a branch of the Barquinha church, based in the city of Ji-Paraná, Brazil. The alkaloid concentrations in the ayahuasca batch were analyzed by mass spectroscopy twice during the trial. On average, the ayahuasca contained (mean±DP): 0.36±0.01 mg/mL of N,N-DMT, 1.86±0.11 mg/mL of harmine, 0.24±0.03 mg/mL of harmaline and 1.20±0.05 mg/mL of tetrahydroharmine (THH).

### 2.3 Salivary cortisol

Saliva was collected using a specific cotton stick called Salivette (Sarstedt, Germany). Volunteers were instructed to place the cotton in the mouth without touching and masticating it for a period of about 1 to 2 minutes. Before and during collection subjects remained at rest and no liquid or food were allowed.

Saliva samples were stored at -80°C in the Laboratory of Hormonal Measures (UFRN) and the salivary cortisol was measured using the ELISA DGR – SLV 4635 kit (DGR International, Inc, Germany).

### 2.4 Plasma cortisol

Blood samples were collected in the morning (7:00 a.m), for total plasma cortisol (PC) assessment. All volunteers were at fast and at complete rest for 45 minutes prior to the exam. After, the samples were stored at -80°C in the Laboratory of Hormonal Measures (UFRN). Total plasma cortisol was measured by ELISA using the DGR-SLV 1887 kit (DGR International, Inc, Germany).

### 2.5 Experimental Procedure

Figure 1 shows the experimental design of the study. After admission, volunteers were interned in the psychiatry division of the University Hospital (HUOL) one night before dosing (D-1), when the MADRS scale of depression was applied. The volunteers slept in the hospital. At 6:00 a.m next day (D0) saliva samples were collected for measuring awakening salivary cortisol and at 7:00 a.m the blood samples were collected for PC assessment. The procedure of collecting of awakening salivary cortisol response consisted of 3 saliva samples: (i) at awakening ( $\pm 5$  minutes), (ii) +30 minutes, and (iii) +45 minutes later.

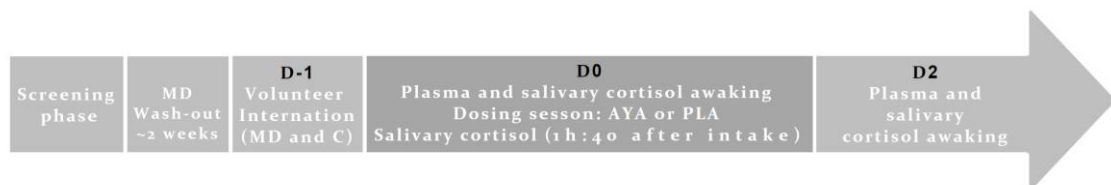

239  
240  
241  
242  
243  
244  
245  
246  
247

Figure 1. Temporal line of experimental design. In this study, patients with major depression (MD) were selected by clinicians in the screening phase that was followed by a pharmacological wash-out phase of approximately two weeks. In D-1, all subjects, healthy volunteers of control group (C) and MD, slept at the hospital (internation) and plasma and salivary cortisol at waking time, at D0, were collected. Also in D0 the dosing session happened, and subjects (C and MD) were divided in two subgroups each, depending on placebo (PLA) or ayahuasca (AYA) intake. During dosing session saliva was collected for cortisol measurement, 1h40 after intake. On D2 (48 hours after intake), again, plasma and saliva collection at awake were performed for cortisol dosage.

248 After a light breakfast, volunteers received instructions and guidance on the effects they  
249 could experience after taking ayahuasca, and strategies to help alleviating any difficulties  
250 encountered.

251

252 Dosing session started around 10:00 a.m. They received a single dose of 1 ml/kg of  
253 ayahuasca (AYA) adjusted to contain 0.36 mg/kg of N,N-DMT, or 1 ml/kg of placebo  
254 (PLA). During the entire session subjects were asked to remain quiet with their eyes  
255 closed while concentrating on their body, thoughts and emotions. They were allowed to  
256 listen to a pre-defined music playlist. Volunteers were supported by at least two  
257 researchers offering assistance when needed. Acute response (%) of salivary cortisol were  
258 assessed during dosing session at two instants: (i) immediately before dosing, and (ii)  
259 +1h40 minutes after the ingestion of placebo or ayahuasca.

260

261 On the following day (D1), volunteers slept again in the hospital, and when woken up at  
262 6:00 a.m. of the next day (D2), 48h after dosing session, 3 saliva samples were collected  
263 for measuring awakening salivary cortisol and at 7:00 a.m the blood samples were  
264 collected for PC assessment. Again, the MADRS scale of depression was applied.

265

## 266 **2.6 Statistical analysis**

267

268 Statistical analysis was conducted in Statistic 12.5 (data analysis software system), and  
269 the level of significance was set at  $p < 0.05$  for all tests. Graphics were built in R 3.4.1  
270 (RStudio).

271

272 The area under the curve (AUC) was calculated from the 3 points of salivary cortisol at  
273 waking time. Both salivary and plasma cortisol levels were normalized by the logarithm  
274 to use parametric tests.

275

276 A parametric test of Analysis of Covariance (ANCOVA) was used to analyze differences  
277 between groups (healthy and patients) at baseline, for both salivary (AUC of awakening  
278 salivary cortisol) and plasma cortisol. Sex was inserted as co-variable.

279 At baseline, *Spearman* correlations were calculated across plasma cortisol and AUC of  
280 awakening salivary cortisol of patients and controls and scores of scales of depression  
281 (HAM-D and MADRS) and duration of disease of patients.

282

283 General Linear Models (GLM) and Fisher *post-hoc* tests were used to evaluate interaction  
284 among: changes of AUC of awakening salivary cortisol response along the days (D0 and  
285 D2), which was considered as dependent variable, and sex (men and women), groups  
286 (healthy volunteers and patients) and treatment (AYA or PLA) as independent variable.  
287 For plasma cortisol, this same analysis was applied but sex was not used as independent  
288 variable, because the number of male patients who received placebo was too small ( $n=2$ ).

289

290 Acute response (%) of salivary cortisol during the dosing session were evaluated 1h40  
291 after ayahuasca or placebo ingestion and assessed by Mann-Whitney test.

292

293 Moreover, *Spearman* correlations test were calculated across acute response (%) of  
294 salivary cortisol during the dosing session for controls and patients of AYA and PLA  
295 groups, plasma cortisol and AUC of awakening salivary cortisol of D2 for patients and  
296 controls of each treatment and scores of MADRS for patients of each treatment.

297



### 298 3 RESULTS

299

300 Socio-demographic characteristics of healthy volunteers, control group (C), and patients  
301 with major depression (MD) are summarized in table 1. All volunteers (n=71; MD=28,  
302 C=43) were Brazilian, adults (MD= 41.54 ± 11.55, C= 31.21 ± 9.87 years, t (69) =4.03  
303 p<0.0001). Patients showed significant lower socioeconomic status backgrounds than  
304 healthy volunteers: large part of MD was unemployed (MD=54%, C=12%, X<sup>2</sup>(1)= 4.74,  
305 p<0.0001), living in a low-income household earning, earn up to 5 minimum wages  
306 (MD=87%, C=71%, X<sup>2</sup>(3)=14.03, p=0.003) and had low education, with up to 8 years  
307 formal education (MD=39%, C=7%, X<sup>2</sup>(3)=19.88, p=0.0002).

308

309 On average, patients presented 11.03±9.70 years of depressive symptoms and met criteria  
310 for moderate-to-severe depression (HAM-D =21.83±5.35). Usually, they were treated  
311 previously with 3.86±1.66 different types of antidepressants and two patients used  
312 electroconvulsive therapy as treatment. Majority of patients presented comorbidity, such  
313 as personality disorder (76%) and anxiety disorder (31%).

314

315

316

317

318

319

320

321

322

323

324

325

326

327

328

329

330

331

332

333

334

335

336

337

338

339

340

341

342

343

344

345

346

347 Table 1. Socio-demographic characteristics of Seventy-one volunteers participated in the  
 348 study: 43 healthy volunteers, control group (19 men and 24 women) without history or  
 349 diagnosis of major illness or psychiatric disorders, and 28 patients with major depression  
 350 (7 men and 21 women).  
 351

|                         | Controls     | Patients      | Statistical analysis                  |
|-------------------------|--------------|---------------|---------------------------------------|
| Participants, n         | 43           | 28            |                                       |
| Age (years)             | 31.21 ± 9.87 | 41.54 ± 11.55 | t(69)=4.03 p < 0.0001                 |
| Gender (M/F)            | 19/24        | 7/21          | X <sup>2</sup> (1) = 2.69 p = 0.10    |
| Unemployed (%)          | 5/43 (12)    | 15/28 (54)    | X <sup>2</sup> (1) = 14.74 p < 0.0001 |
| Household income        |              |               | X <sup>2</sup> (3) = 14.03 p = 0.003  |
| < 5 wages (%)           | 19/86 (71)   | 22/56 (87)    |                                       |
| 6-10 wages (%)          | 14/43(7)     | 2/28 (6.6)    |                                       |
| 11 or more wages (%)    | 10/43 (21)   | 4/28 (6.6)    | X <sup>2</sup> (3) = 19.88 p = 0.0002 |
| Education               |              |               |                                       |
| Up to 8 years, n (%)    | 3/43 (7)     | 11/28 (39)    |                                       |
| 9-11 years, n (%)       | 4/43 (9)     | 8/28 (29)     |                                       |
| 12-16 years, n (%)      | 18/43(42)    | 4/28 (14)     |                                       |
| 17 or more years, n (%) | 18/43 (42)   | 5/28 (18)     |                                       |

352

353

### 354 **3.1 Baseline assessments (D0)**

355

356 Figure 2 shows the cortisol levels at baseline (D0). Figure 2a shows the AUC of  
 357 awakening salivary cortisol response for both groups (C and MD) at baseline. AUC level  
 358 at baseline was lower for patients (MD; n= 20  $\mu_{AUC}=49.4\pm 8.3$  cm<sup>2</sup>) than healthy controls



359 (C; n= 41  $\mu_{AUC}=62.5\pm6.3$  cm<sup>2</sup>), and these differences were independent of sex (ANCOVA  
360 main effects: Group\*: F=9.75 df=1 p=0.002, Sex\*: F=0.42 df=1 p=0.51). Figure 2b shows  
361 the results for plasma cortisol. The same profile is observed in plasma cortisol at baseline,  
362 which was lower in patients (MD; n= 28  $\mu_{PC}=15.12\pm1.73$  mg/dl) than in healthy controls  
363 (C; n= 43  $\mu_{PC}=19.52\pm1.37$  mg/dl). Again, these differences were independent of sex  
364 (ANCOVA main effects: Group\*: F=4.71 df=1 p=0.03, Sex\*: F=0.89 df=1 p=0.34).  
365 Figure 2b also illustrates patients that show relative (n=17 and 61%) and true  
366 hypocortisolemia n=6 and 22.22%), with total plasma cortisol levels below 15 $\mu$ g/dl and  
367 10 $\mu$ g/dl, respectively.  
368

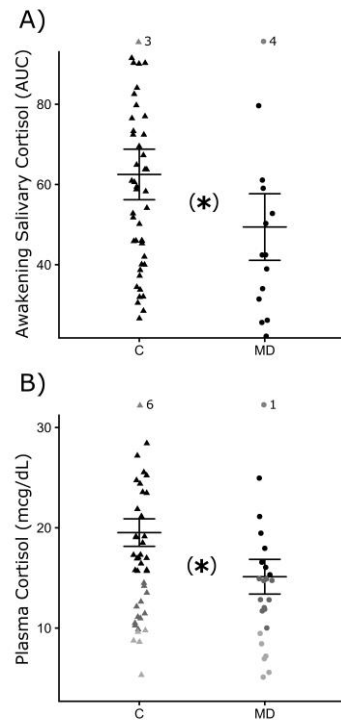

369

370

371 Figure 2. Mean and standard deviation of cortisol levels at baseline (D0) for: A) AUC (area under the curve) of  
372 awakening salivary cortisol for control group (C – closed triangle) and patients with major depression (MD – closed  
373 circle) and B) plasma cortisol for C and MD. Relative hypocortisolemia (< 15mcg/dl) = dark gray symbols and true  
374 hypocortisolemia (< 10mcg/dl) = light gray symbols. Each symbol (triangle or circle) indicate individual value of  
375 volunteer. \* = statistically significant difference between the groups. ANCOVA, p  $\leq$ 0.05.  
376

377

378 In baseline, the scores MADRS of patients were  $32.67\pm6.31$ . A positive significant  
379 correlation was observed between cortisol levels (plasma and AUC) for controls (p<0.05  
380  $r_s=0.54$ ), but not for patients. No significant correlations were found across cortisol levels  
381 (plasma and salivary), scores of scales of depression (HAM-D and MADRS) and duration  
382 of disease for patients (see table 1 of suppl. material for details).  
383

384

385

### 386 3.2 Acute effects of ayahuasca during dosing session

387

388 Figure 3 shows the acute response (%) of salivary cortisol observed 1h40 after ayahuasca  
389 or placebo ingestion, during dosing session. Figure 3a shows that patients in the  
390 ayahuasca group (n=10) presented greater salivary cortisol increases (median=98.72;  
Q25%=37.89; Q75%=177.16) compared to the placebo group (n=12) (median=23.26;  
Q25%=-5.44; Q75%=41.65) (Mann-Whitney test U=27 p=0.03). Figure 3b shows the

391 same profile for the healthy volunteers. Controls of the ayahuasca group (n=21) showed  
392 greater increases of salivary cortisol levels (median=146.87; Q25%=53.32;  
393 Q75%=211.84) compared to the placebo group (n=20) (median=38.50; Q25%=10.33;  
394 Q75%=60.27) (Mann-Whitney test U=84 p=0.01). Figure 3c compares patients and  
395 controls that ingested ayahuasca, both showing similar changes of salivary cortisol at  
396 1h40min after ingestion of ayahuasca (Mann-Whitney test U=85 p=0.66; patients  
397 median=98.72; Q25%=37.89; Q75%=177.16, controls median=146.87; Q25%=53.32;  
398 Q75%=211.84). Changes of salivary cortisol (%) for patients from ayahuasca or placebo  
399 group during dosing session were not correlated with scores of MADRS at D2 (see table  
400 2 of suppl. material for details).

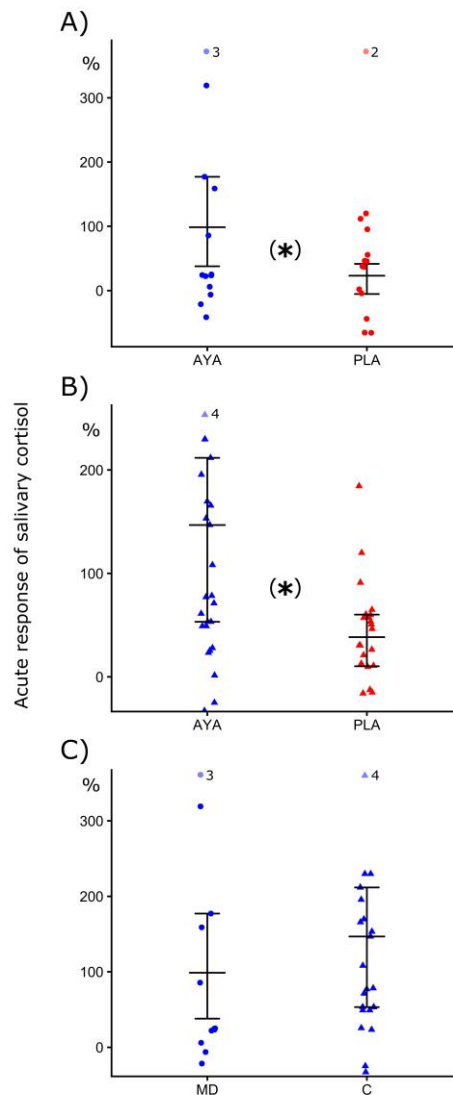

401 Figure 3. Mean and standard deviation of acute response (%) of salivary cortisol at 1h40min after the dosing session.  
402 A) For patients with major depression (MD – closed circle) after ingestion of ayahuasca (AYA- blue color) or placebo  
403 (PLA- red color), B) control group (C- closed triangle) after ingestion of ayahuasca or placebo and C) MD and C  
404 after ingestion of ayahuasca. Each symbol (triangle or circle) indicate individual value of volunteer.\* = statistically  
405 significant difference between the groups. Mann-Whitney non-parametric test,  $p \leq 0.05$ .  
406  
407

### 408 3.3 Post-treatment assessments (D2)

409 Two days after dosing (D2), the scores of MADRS were  $55.79 \pm 32.14$  for patients of ayahuasca group and  $61.42 \pm 25.7$  for patients of placebo group, 77% of patients responded  
410 in the ayahuasca group and 64% in the placebo.  
411  
412

413

414 Figure 4 shows AUC of awakening salivary cortisol response for both groups (C and MD)  
415 and treatments (ayahuasca and placebo) in baseline (D0) and 48h after dosing session  
416 (D2) (GLM: Group\*Treatment\*Days:  $F=4.57$ ,  $p=0.03$ , all values of main effects and  
417 interactions of GLM are in table 3 of supplementary material). Figure 4a comparing  
418 changes in AUC along the days (D0 and D2) within groups and treatment and no  
419 significant variations were found (see table 4 of suppl. material for details of statistical  
420 values of Fisher *post-hoc* test). Figure 4b comparing AUC levels across group of patients  
421 and control for both treatments, at D2. Was found similar AUC in patients who ingested  
422 ayahuasca ( $\mu_{AUC}=59.4\pm 12.7$  cm<sup>2</sup>) and healthy subjects that ingested ayahuasca  
423 ( $\mu_{AUC}=50.1\pm 8.2$  cm<sup>2</sup>) (Fisher *post-hoc*:  $p=0.45$ ) or placebo ( $\mu_{AUC}=61.9\pm 8.9$  cm<sup>2</sup>) (Fisher  
424 *post-hoc*:  $p=0.14$ ). On the other hand, patients that ingested placebo continued presenting  
425 lower AUC ( $\mu_{AUC}=41.2\pm 14.8$  cm<sup>2</sup>) relative to controls that ingested placebo  
426 ( $\mu_{AUC}=61.9\pm 8.9$  cm<sup>2</sup>) (Fisher *post-hoc*:  $p=0.03$ ), as was observed in baseline. Influence  
427 of sex was not observed in statistical analysis (see table 3 of supplementary material).  
428 Individual changes of AUC between D0 and D2 were illustrated for each group and  
429 treatment in supplementary material (figure 1).  
430

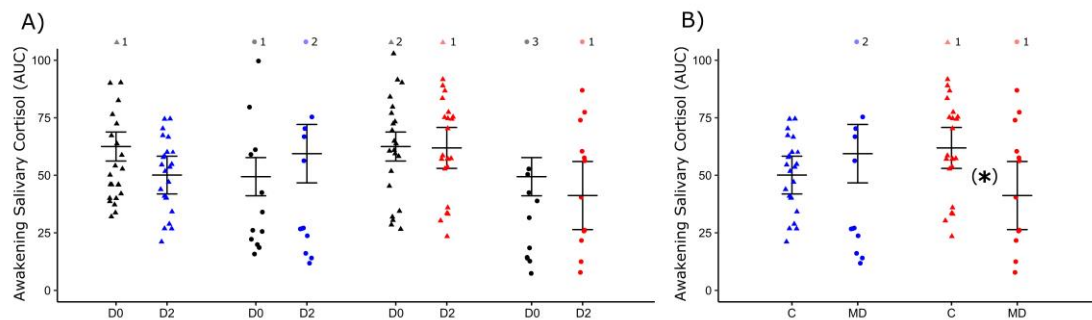

431

432

433 Figure 4. Mean and standard deviation of area under the curve (AUC) of awakening salivary cortisol. A) In baseline  
434 (D0- black color) and 48h after dosing session (D2) of control group (C closed triangle) and patients with major  
435 depression (MD – closed circle) that ingested ayahuasca (blue color) or placebo (red color). B) AUC in D2 for patients  
436 and control and patients of both treatment. Each symbol (triangle or circle) indicate individual value of volunteer. \* =  
437 statistically significant difference between groups. GLM and post hoc Fisher,  $p < 0.05$ .  
438

439

440 Figure 5 shows the levels of total plasma cortisol for both groups (C and MD) and  
441 treatments (ayahuasca and placebo) in baseline (D0) and 48h after dosing session (D2),  
442 no significant changes between D0 and D2 within both groups and treatment were  
443 observed. Moreover, no significant difference between groups and treatments were found  
444 (all values of main effects and interactions of GLM are in table 5 of supplementary  
445 material). Individual changes in PC between D0 and D2 were illustrated for each group  
and treatment in figure 2 of supplementary material.

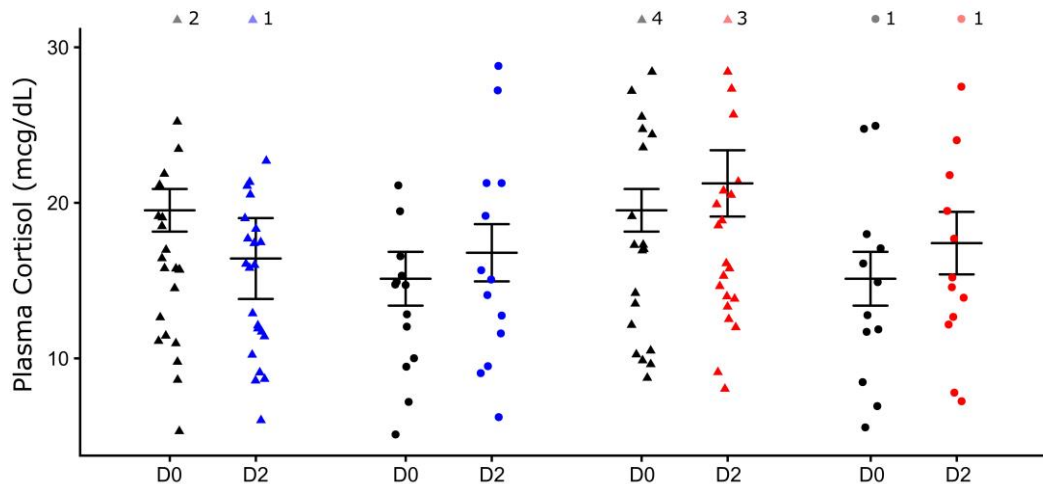

446

447

448

449

450

451

452

453

454

455

456

457

458

459

460

461

462

463

464

465

466

467

468

469

470

471

472

473

474

475

476

477

478

479

480

481

482

483

Figure 5. Mean and standard deviation of plasma cortisol (PC) in baseline (D0- black color) and 48h after dosing session (D2) of control group (C – closed triangle) and patients with major depression (MD – closed circle) that ingested ayahuasca (blue color) or placebo (red color). Each symbol (triangle or circle) indicate individual value of volunteer. GLM and *post hoc* Fisher,  $p \leq 0.05$ .

No statically significant correlations were observed across plasma cortisol and AUC of awakening salivary cortisol of D2 for patients and controls of each treatment and scores of MADRS for patients of each treatment. All values of *Spearman* correlation are in supplementary material, table 2.

#### 4 DISCUSSION

In this study we found basal hypocortisolemia and blunted awakening salivary cortisol response in treatment-resistant patients with major depression, compared to healthy subjects. After treatment of patients and controls with ayahuasca or placebo, was observed (1 hour and 40 minutes after ingestion) major acute increases in salivary cortisol of groups that ingested ayahuasca compared to placebo-ingesting groups. Moreover, 48h after (D2) of the dosing session with ayahuasca, awakening salivary cortisol response (for both sexes) of treated patients became similar to levels detected in controls. This was not observed in patients that ingested placebo that continued showing blunted AUC of awakening salivary cortisol response compared to the control group that ingested placebo. Two days after dosing session (D2), 77% of patients that were treated with ayahuasca showed response while 64% from the placebo group responded. Clinical response was defined as a reduction of 50% or more in baseline scores, of scales of depression.

Cortisol is a steroid hormone that triggers stress response in an adaptive way: it increases cardiovascular and respiratory systems activity, mobilizes glucose to provide enough fuel needed to remove the stressor and limit acute inflammation processes (45). Not only the excess, but also the reduction of this hormone is believed to be harmful, major depression traditionally has been associated mainly with hypercortisolism, but an increasing number of studies have been found hypocortisolism in depression (8, 46, 47). The chronic decrease in cortisol levels induces non-specific symptoms such as general malaise, weakness, low blood pressure, muscle weakness, loss of appetite and weight, gastrointestinal complaints and immunological dysfunction (48). Moreover, low cortisol levels are present in some physiological diseases as Addison's disease (49) and adrenal insufficiency (50, 51) and some psychopathologies as post-traumatic stress disorders (52).

484

485 Thus, these results partially corroborate our hypothesis, since control group and patients  
486 presented, at baseline, different total plasma cortisol levels and awakening salivary  
487 cortisol response, since patients showed hypocortisolemia and blunted awakening  
488 salivary cortisol response. But, unexpectedly these alterations in cortisol observed in  
489 baseline for patients not were correlated with severity or duration of disease.

490

491 In literature more severe depression, marked by a chronic or recurrent disease, frequently  
492 disclose hypocortisolism (46, 8, 47). These patients often exhibit long-term exposition to  
493 stressors, which in the early phase of disease may induce a chronic upregulated activity  
494 of the HPA axis and hypercortisolemia, after this, a maladaptive regulation of the HPA  
495 function reduces cortisol to very low pathological levels (53, 54). In addition, evidence  
496 suggests that prolonged use of some antidepressants may also lead to increased expression  
497 of cortisol receptors and increased sensitivity of negative feedback, thus decreasing  
498 cortisol levels to under homeostatic values (55). Our patients are treatment-resistants and  
499 used an average of  $3.86 \pm 1.66$  different types of antidepressants, which could in turns  
500 induced hypocortisolemia.

501

502 Low cortisol levels in depression have also been associated with maladaptive coping style  
503 (56) and unfavorable socioeconomic status (57, 13). Patients in this study had a particular  
504 profile: they live in Rio Grande do Norte, a state of Northeast Brazil, a region  
505 characterized by low socioeconomic status, low educated and living in a low-income  
506 household, in a stressful environment. Previous studies, of other research groups, have  
507 reported similar results. They found low levels of cortisol at awakening in patients with  
508 depression in our state (Rio Grande do Norte) compared to healthy volunteers (58), and  
509 with patients from Canada (58). Due to significant levels of poverty and scarce  
510 government investments in this region, this population usually is submitted to a long  
511 exposure of adverse events in life, and early in life they cope with precarious physical  
512 and physiological health, as well as with cumulative social and economic disadvantage  
513 conditions.

514

515 The etiology of hypocortisolism is explained by various theories. One of them shows that  
516 a greater and decompensate sensitivity in negative feedback of the HPA axis deregulates  
517 cortisol secretion (54). Also, hypocortisolism is associate to adrenal insufficiency, a  
518 failure to produce cortisol and a decrease or increase in Adrenocorticotrophic hormone  
519 (ACTH) concentrations that depend on the type of failure, whether primary or secondary,  
520 respectively (48). New evidence also appoints the participation of paracrine and autocrine  
521 messengers in adrenal failure (59). While several theories try to explain the etiology of  
522 hypocortisolism, it seems that the best approach to elucidate this pathophysiological  
523 process involves the integration of all these theories.

524

525 The regulation of cortisol is an important physiological aspect on the way of achieving  
526 biological health, since cortisol is an integrative hormone with large potential of body  
527 modulation, particularly involved in the etiology of depression, engaging immune and  
528 monoaminergic systems (60, 53). Moreover, optimal levels of cortisol are necessary to  
529 induce neurogenesis, possibly due to its modulatory properties over brain-derived  
530 neurotrophic factor (BDNF) transcription and binding to its receptor (61, 62, 63). This  
531 relation seems an important factor in the etiology of depression, considering that the  
532 effectiveness of traditional antidepressants seems to be mediated by neuronal plasticity  
533 and neurogenesis (64).



534

535 Here, we found that depressive patients showed basal hypocortisolemia and blunted  
536 awakening salivary cortisol response in comparison to controls. The values for diagnosis  
537 of corticosteroid insufficiency varies, some studies point cortisol levels below 15µg/dl  
538 and others under 10µg/dl as hypocortisolemia (65, 66, 67). Studies that evaluated the  
539 utility of basal morning serum cortisol measurements in the diagnosis of adrenal  
540 insufficiency showed that values below 10µg/dl had 77% of specificity, and 62 of  
541 sensitivity (as defined by a subnormal serum cortisol response to insulin-induced  
542 hypoglycemia) acting as good indicator of disease (68, 69). In this study we considered  
543 10µg/dl as value of cutoff for true hypocortisolemia. We observed that 61% of patients  
544 showed relative hypocortisolemia (below 15µg/dl) and 22.22% true hypocortisolemia  
545 (below 10µg/dl). The awakening salivary cortisol response has been less used than plasma  
546 cortisol to monitor adrenal insufficiency, because it not had been fully validated as the  
547 diagnostic test.

548

549 The levels of cortisol in plasma and saliva, at baseline, was positively correlated for  
550 controls, but not for patients. It is observed correlation between total plasma and salivary  
551 cortisol in healthy subjects (70). Probably this correlation not occurs in patients because  
552 of the malfunction of their HPA axis (71) or by changes in concentration of CBG (Cortisol  
553 Binding Globulin), its protein of transportation in plasma (70).

554

555 During the acute effects of ayahuasca we found increased cortisol levels, 1h40 after  
556 intake. Previous studies in healthy subjects have also reported increased cortisol levels  
557 during the acute effects of ayahuasca (72, 73, 74), N,N-DMT (75), psilocybin (76,77) and  
558 LSD (78). One should bear in mind that our patients presented, in general,  
559 hypocortisolemia and blunted awakening salivary cortisol response. It is reasonable to  
560 consider that subjects who took ayahuasca which immediately increased cortisol levels  
561 probably were acutely benefited by the ingestion of the ayahuasca, thereby leading to a  
562 direction of achieving the hormonal homeostasis.

563

564 After 48 hours of dosing session, no changes with respect to baseline within each group,  
565 both treatments, were observed for AUC of awakening salivary cortisol response and  
566 plasma cortisol. Individual changes of AUC and PC between D0 and D2 showed a large  
567 variability in these responses. Some studies also faced with this large individual  
568 variability in baseline levels and response of cortisol (79), and these are facts that disturb  
569 the validation of cortisol as biomarker in DM (80). However, after 48 hours of dosing  
570 session the AUC of awakening salivary cortisol response of patients that ingested  
571 ayahuasca, and not placebo, became similar to both control that ingested ayahuasca and  
572 placebo, the initial blunted response of depressed patients disappear. This similarity of  
573 AUC between controls and patients that were treated with ayahuasca points to a beneficial  
574 modulation of ayahuasca on awakening salivary cortisol response.

575

576 Some studies with animal models of depression, rodents and non-human primates,  
577 observed positive antidepressant effects with the use of ayahuasca or its specific  
578 components (81, 82, 83). Using the recently validated translational animal model of  
579 depression (84), young marmosets (*Callithrix jacchus*) were treated with nortriptyline  
580 during 7 days, a tricyclic antidepressant, or with a single dose of ayahuasca. It was  
581 observed that ayahuasca increased fecal cortisol levels until 48 hours after it ingestion  
582 and presented more notable antidepressant effects than nortriptyline, since it reverted  
583 depressive-like behaviors and regulated cortisol levels faster and during more time (83).



584

585 The modulation of HPA axis by antidepressants depend on the type of antidepressant used  
586 and the duration of treatment, acute or chronic. Noradrenaline or serotonin (5HT)  
587 reuptake-inhibiting antidepressants, such as reboxetine and citalopram, acutely stimulate  
588 cortisol secretion in healthy volunteers, probably due the elevation in 5HT levels (85, 86).  
589 On the other hand, some antidepressants, as mirtazapine, acutely inhibits cortisol release,  
590 probably due to its selective antagonism at 5-HT<sub>2</sub> receptors (85). It is interesting to notice  
591 that the long-term effects of antidepressants are frequently opposite of the acute ones. In  
592 long way, reboxetine up-regulates cortisol receptors function, repairs the disturbed  
593 feedback control and normalizes HPA axis. Mirtazapine, within 1 week, markedly  
594 reduces HPA axis activity in depressed patients (85, 86). If the patient is resistant to  
595 treatments, and uses antidepressants by years, the long-term effects could be disturbed  
596 and followed by a disfavorable physiological response, as cited above, the chronic use of  
597 some antidepressant could induces hypocortisolemia.

598

599 Here, the acute increases of cortisol levels by the ayahuasca can be due the rise in  
600 serotonin induced by the N,N-DMT, and  $\beta$ -carbolinic alkaloids (31, 32, 33), likewise,  
601 literature appoints to a modulation of the secretion of CRH and ACTH both at the  
602 hypothalamic and pituitary glands by serotonin (87).

603

604 In clinical practice the physiological variables are not used for the diagnosis of DM or for  
605 choose and evaluate treatments (88). The use of cortisol as a biomarker could aid in the  
606 diagnosis, prognosis and analysis of the evolution of the treatments. As discussed, DM is  
607 correlated to hyper and hypocortisolemia and antidepressants have distinct action in  
608 cortisol levels, thus the use of cortisol as biomarker could influence the choice of  
609 treatment. In this way, as ayahuasca increases cortisol levels acutely, its use as  
610 antidepressant could be favorable for depressive patients that show hypocortisolemia.  
611 However, more investigation are necessary, mainly chronic treatment studies.

612

613 Again, once more, our hypothesis was partially corroborated. As was hypothesized,  
614 ayahuasca induced a large increase in acute salivary cortisol response than placebo.  
615 Although, this increase was not sustained along 48 hours, patients that ingested  
616 ayahuasca, and not placebo, presented similar AUC of awakening salivary cortisol  
617 response compared to controls (ayahuasca and placebo) in D2. This last finding, although  
618 it is different from the hypothesis, is important and corroborates with the improvement of  
619 several physiological system, emotional and cognitive aspects that was regulated by  
620 cortisol (89, 90). Patients showed considerable reduction in depressive symptoms in D2,  
621 however, this progress was not correlated with cortisol changes, either acutely nor 48  
622 hours after dosing.

623

624 Our results suggest that the AUC awakening salivary cortisol response is a more robust  
625 biomarker than the PC, since it was altered in baseline and it was sensible to treatment by  
626 ayahuasca. Other studies appoint in the same way, considering the awakening salivary  
627 cortisol response as more strong marker than PC, as it is less modulated by circadian  
628 clock and by daily stressors than PC (79). As well as, some prospective studies have  
629 shown that awakening salivary cortisol, and not total PC levels, could predict depressive  
630 episodes (91, 92)

631

632 However, we should be cautious when trying to consider salivary cortisol, in an isolated  
633 way, as a biomarker for the diagnosis of DM, since altered cortisol patterns are also found

634 in other mental disorders and in this study we not found correlation between improvement  
635 in depressive symptoms and in AUC of awakening salivary cortisol response. Many  
636 studies argue that, in an individual way, this biomarker fits more in the aid of prognostics  
637 and therapeutic accompaniments than in the diagnosis. On the other hand, it is suggested  
638 that a panel of neuroendocrine and immune biomarkers would be the most suitable for  
639 the aid in the diagnosis of psychopathologies, as recently proposed for depression (93).  
640 In the current overview, however, we emphasize that more studies are required to increase  
641 the assumption that salivary cortisol can be useful as a biomarker in order to contribute  
642 with valuable information in the diagnostic, prognostic and therapeutic results in major  
643 depression

644  
645 In sum, the present study appoints new evidence of improvements of depressive  
646 symptoms and of AUC of awakening salivary cortisol response by ayahuasca, 48 hours  
647 after its ingestion, in DM patients with treatment-resistant depression, which presented  
648 blunted salivary cortisol awakening response and hypocortisolemia. As cortisol act in  
649 regulation of distinct physiological, cognitive and emotional partway, the improvement  
650 of its awakening response could be important as part of the antidepressant effects. Taking  
651 these findings in account, this work contributes significantly to support the return of  
652 clinical studies with natural psychedelics applied to mental disorders.

653

#### 654 **Conflict of Interest Statement**

655

656 That research was conducted in the absence of any commercial or financial relationships  
657 that could be construed as a potential conflict of interest.

658

#### 659 **Author and Contributors**

660

661 Galvão-Coelho N., Lobão-Soares B., Araújo D.B. Maia-de-Oliveira, J.P, Arcoverde E  
662 and Palhano-Fontes F. designed the experiments; Almeida, R. N. and Galvão A.C  
663 measured hormonal data; Freitas, F., Palhano-Fontes F., Onias, H., Galvão A.C. and  
664 Silva, E.A. collected experimental data, carried out statistical analysis and prepared  
665 figures. Prepared manuscript Galvão-Coelho N., Lobão-Soares B., Araújo D.B., Palhano-  
666 Fontes F., Galvão A.C. and Silva, E.A.

667

#### 668 **Acknowledgments**

669

670 The authors would like to express their gratitude to all patients who volunteered for this  
671 experiment, and to the Hospital Universitário Onofre Lopes (HUOL), from the Federal  
672 University of Rio Grande do Norte, Brazil, for institutional support. This study was  
673 funded by the Brazilian National Council for Scientific and Technological Development  
674 (CNPq, grants #466760/2014 & #479466/2013), and by the CAPES Foundation within  
675 the Ministry of Education (grants #1677/2012 & #1577/2013).

676

#### 677 **5 REFERENCES**

678

679 [1] World Health Organization. 2016. Facts sheets No 369 – Depression. Encontrado em  
680 23 de agosto 2016, <http://www.who.int/media centre/factsheets/fs369/en/>

681 [2] Cizza, G., Ronsaville, D.S., Kleitz, H., Eskandari, F., Mistry, S., Torvik, S.,  
682 Sonbolian, N., Reynolds, J.C., Blackman, M.R., Gold, P.W., Martinez, P.E. (2012).  
683 Clinical Subtypes of Depression Are Associated with Specific Metabolic Parameters and

- 684 Circadian Endocrine Profiles in Women: The Power Study. *PLoS ONE*, **7**:1. doi:  
685 10.1371/journal.pone.0028912
- 686 [3] Gold, P.W., Chrousos, G.P. (2002). Organization of the stress system and its  
687 dysregulation in melancholic and atypical depression: high vs low CRH/NE states. *Mol.*  
688 *Psychiatry*. **7**, 254. doi: 10.1038/sj.mp.4001032
- 689 [4] O’Keane, V., Frodl, T., Dinan, T.G. (2012). A review of atypical depression in relation  
690 to the course of depression and changes in HPA axis organization.  
691 *Psychoneuroendocrinol.* **37**. doi: 10.1016/j.psyneuen.2012.03.009.
- 692 [5] Ferrari, F., Villa, R.F. (2016). The neurobiology of depression: an integrated overview  
693 from biological theories to clinical evidence. *Mol. Neurobiol.* **54**. doi: 10.1007/s12035-  
694 016-0032-y
- 695 [6] Fries, E., Dettenborn, L., Kirschbaum, C., (2009). The cortisol awakening response  
696 (CAR): facts and future directions. *Int. J. Psychophysiol.* **72**. doi:  
697 10.1016/j.ijpsycho.2008.03.014.
- 698 [7] Bhagwagar, Z., Hafizi, S., Cowen, P. J. (2005). Increased salivary cortisol after  
699 waking in depression. *Psychopharmacology*. **182**. doi: [https://doi.org/10.1007/s00213-](https://doi.org/10.1007/s00213-005-0062-z)  
700 [005-0062-z](https://doi.org/10.1007/s00213-005-0062-z)
- 701 [8] Bremner, M.A., Deeg, D.J., Beekman, A.T., Penninx, B.W., Lips, P., Hoogendijk,  
702 W.J. (2007). Major depression in late life is associated with both hypo-and  
703 hypercortisolemia. *Biol. Psychiatry*. **62**. doi: 10.1016/j.biopsych.2006.11.033
- 704 [9] Kunugi, H., Hori, H., Ogawa, S. (2015). Biochemical markers subtyping major  
705 depressive disorder. *Psychiatry Clin. Neurosci.* **69**. doi: 10.1111/pcn.12299
- 706 [10] Kaestner, F., Hettich, M., Peters, M., Sibrowski, W., Hetzel, G., Ponath, G., Arolt,  
707 V., Cassens, U., Rothermundt, M. (2005). Different activation patterns of  
708 proinflammatory cytokines in melancholic and non-melancholic major depression are  
709 associated with HPA axis activity. *J. Affect. Disord.* **87**. doi:10.1016/j.jad.2005.03.012
- 710 [11] Dedovic, K., Engert, V., Duchesne, A., Lue, S.D., Andrews, J., Efanov, S.I.,  
711 Beaudry, T., Pruessner, J.C. (2010). Cortisol awakening response and hippocampal  
712 volume: vulnerability for major depressive disorder? *Biol. Psychiatry*. **68**. doi:  
713 10.1016/j.biopsych.2010.07.025.
- 714 [12] Lamers, F., Vogelzangs, N., Merikangas, K.R., De Jonge, P., Beekman, A.T.F.,  
715 Penninx, B.W.J.H. (2013). Evidence for a differential role of HPA-axis function,  
716 inflammation and metabolic syndrome in melancholic versus atypical depression. *Mol.*  
717 *Psychiatry*. **18**. doi: 10.1038/mp.2012.144.
- 718 [13] Zilioli, S., Imami, L., Slatcher, R.B. (2017). Socioeconomic status, perceived  
719 control, diurnal cortisol, and physical symptoms: A moderated mediation model.  
720 *Psychoneuroendocrinology*. **75**. doi: <https://doi.org/10.1016/j.psyneuen.2016.09.025>
- 721 [14] Piwowarska, J., Chimiak, A., Matsumoto, H., Dziklińska, A., Radziwoń-Zaleska,  
722 M., Szelenberger, W., Pachecka, J. (2012). Serum cortisol concentration in patients with  
723 major depression after treatment with fluoxetine. *Psychiatry Res.* **198**. doi:  
724 <https://doi.org/10.1016/j.psychres.2012.01.029>
- 725 [15] Bolland, R., and Keller, M. (2004). Textbook of Psychopharmacology. AF S, CB N,  
726 editors. Arlington.
- 727 [16] Vismari, L., Alves, G.J., Palermo-Neto, J. (2008). Depression, antidepressants and  
728 immune system: a new look to an old problem. *Rev. Bras. Psiquiatr.* **35**. doi:  
729 10.1590/S0101-60832008000500004
- 730 [17] Cipriani, A., Furukawa, T.A., Salanti, G., Geddes, J.R., Higgins, J.P., Churchill, R.,  
731 Watanabe, N., Nakagawa, A., Omori, I.M., McGuire, H., Barbui, C., Tansella, M. (2009).  
732 Comparative efficacy and acceptability of 12 new-generation antidepressants: a multiple-  
733 treatments meta-analysis. *Lancet*. **373**. doi: 10.1016/S0140-6736(09)60046-5.

- 734 [18] Seehusen, D.A., Sheridan, R. (2013). Second-generation antidepressants for  
735 depression in adults. *Am. Fam. Physician.* 88(10), 687-689
- 736 [19] Vollenweider, F. X., & Kometer, M. (2010). The neurobiology of psychedelic drugs:  
737 implications for the treatment of mood disorders. *Nat. Rev. Neurosci.* 11. doi:  
738 <http://dx.doi.org/10.1038/nrn2884>
- 739 [20] Carhart-Harris, R.L., Bolstridge, M., Rucker, J., Day, C.M., Erritzoe, D., Kaelen, M.,  
740 Bloomfield, M., Rickard, J.A., Forbes, B., Feilding, A., Taylor, D., Pilling, S., Curran,  
741 H.V., Nutt, D.J. (2016). Psilocybin with psychological support for treatment-resistant  
742 depression: an open-label feasibility study. *Lancet Psychiatry*, 3. doi:  
743 [https://doi.org/10.1016/S2215-0366\(16\)30065-7](https://doi.org/10.1016/S2215-0366(16)30065-7)
- 744 [21] Griffiths, R.R., Johnson, M.W., Carducci, M.A., Umbricht, A., Richards, W.A.,  
745 Richards, B.D., Cosimano, M.P., Klinedinst, M.A. (2016). Psilocybin produces  
746 substantial and sustained decreases in depression and anxiety in patients with life-  
747 threatening cancer: A randomized double-blind trial. *J. Psychopharmacol.* 30, 1181-  
748 1197.
- 749 [22] Ross, S., Bossis, A., Guss, J., Agin-Liebes, G., Malone, T., Cohen, B., Mennenga,  
750 S.E., Belser, A., Kalliontzi, K., Babb, J., Su, Z., Corby, P., Schmidt, B.L. (2016). Rapid  
751 and sustained symptom reduction following psilocybin treatment for anxiety and  
752 depression in patients with life-threatening cancer: a randomized controlled trial. *J.*  
753 *Psychopharmacol.* 30. doi: <https://doi.org/10.1177/0269881116675512>
- 754 [23] Sanches, R.F., de Lima Osório, F., Dos Santos, R.G., Macedo, L.R., Maia-de-  
755 Oliveira, J.P., Wichert-Ana, L., de Araujo, D.B., Riba, J., Crippa, J.A., Hallak, J.E. (2016).  
756 Antidepressant effects of a single dose of ayahuasca in patients with recurrent depression:  
757 a SPECT study. *J. Clin. Psychopharmacol.* 36. doi: 10.1097/JCP.0000000000000436.
- 758 [24] Osório, F.D.L., Macedo, L.R.H., de Sousa, J.P.M., Pinto, J.P., Quevedo, J., Crippa,  
759 J.A., and Hallak, J.A.S. (2011). “Therapeutic potential of harmine and ayahuasca in  
760 depression: evidence from exploratory animal and human studies,” in *The*  
761 *Ethnopharmacology of Ayahuasca*, ed. R.G. dos Santos (Kerala: Transworld Research  
762 Network), 75–85.
- 763 [25] Labate, B.C., and Jungaberle, H. (2011). The internationalization of ayahuasca. LIT  
764 Verlag Münster.
- 765 [26] McKenna, D.J., Towers, G.N., Abbott, F. (1984). Monoamine oxidase inhibitors in  
766 South American hallucinogenic plants: tryptamine and  $\beta$ -carboline constituents of  
767 ayahuasca. *J. Ethnopharmacol.* 10, 195-223.
- 768 [27] Fontanilla, D., Johannessen, M., Hajipour, A.R., Cozzi, N.V., Jackson, M.B., Ruoho,  
769 A.E. (2009). The hallucinogen N, N-dimethyltryptamine (DMT) is an endogenous sigma-  
770 1 receptor regulator. *Science.* 323. doi: 10.1126/science.1166127
- 771 [28] Baumeister, D., Barnes, G., Giaroli, G., Tracy, D. (2014). Classical hallucinogens as  
772 antidepressants? A review of pharmacodynamics and putative clinical roles. *Ther. Adv.*  
773 *Psychopharmacol.* 4. doi: 10.1177/2045125314527985
- 774 [29] Carbonaro, T.M., Eshleman, A.J., Forster, M.J., Cheng, K., Rice, K.C., Gatch, M.B.  
775 (2015). The role of 5-HT<sub>2A</sub>, 5-HT<sub>2C</sub> and mGlu<sub>2</sub> receptors in the behavioral effects of  
776 tryptamine hallucinogens N, N-dimethyltryptamine and N, N-diisopropyltryptamine in  
777 rats and mice. *Psychopharmacology.* 232. doi: [https://doi.org/10.1007/s00213-014-3658-](https://doi.org/10.1007/s00213-014-3658-3)  
778 3
- 779 [30] Frecka, E., Bokor, P., Winkelmann, M. (2016). The therapeutic potentials of  
780 ayahuasca: possible effects against various diseases of civilization. *Front. Pharmacol.* 7.  
781 doi: 10.3389/fphar.2016.00035
- 782 [31] Grella, B., Teitler, M., Smith, C., Herrick-Davis, K., Glennon, R.A. (2003). Binding  
783 of  $\beta$ -carbolines at 5-HT<sub>2</sub> serotonin receptors. *Bioorg. Med. Chem. Lett.* 13, 4421-4425.



- 784 [32] Martinez, S.T., Almeida, M.R., Pinto, A.C. (2009). Alucinógenos naturais: um voo  
785 da Europa Medieval ao Brasil. *Quim. Nova.* **32**. doi: 10.1590/S0100-  
786 40422009000900047
- 787 [33] Silva, L.V., Barbosa, B.R.S.N. (2016). Limitações entre o religioso e o público: o  
788 uso político-religioso da ayahuasca. *Frag. Cult.* **26**. doi: 10.18224/frag.v26i4.4658
- 789 [34] Barbosa, P.C.R., Cazorla, I.M., Giglio, J.S., Strassman, R. (2009). A six-month  
790 prospective evaluation of personality traits, psychiatric symptoms and quality of life in  
791 ayahuasca-naïve subjects. *J. Psychoactive Drugs.* **41**, 205-212.
- 792 [35] Bouso, J.C., González, D., Fondevila, S., Cutchet, M., Fernández, X., Barbosa, P.  
793 C.R., Alcázar-Córcoles, M.Á., Araújo, W.S., Barbanoj, M.J., Fábregas, J.M., Riba, J.  
794 (2012). Personality, psychopathology, life attitudes and neuropsychological performance  
795 among ritual users of ayahuasca: a longitudinal study. *PLoS One.* **7**. Doi:  
796 10.1371/journal.pone.0042421.
- 797 [36] dos Santos, R.D., Landeira-Fernandez, J., Strassman, R.J., Motta, V., Cruz, A.P.M.  
798 (2007). Effects of ayahuasca on psychometric measures of anxiety, panic-like and  
799 hopelessness in Santo Daimé members. *J. Ethnopharmacol.* **112**, 507-513.
- 800 [37] Bouso, J.C., Fábregas, J.M., Antonijoan, R.M., Rodríguez-Fornells, A., Riba, J.  
801 (2013). Acute effects of ayahuasca on neuropsychological performance: differences in  
802 executive function between experienced and occasional users. *Psychopharmacology.*  
803 **230**. doi: 10.1007/s00213-013-3167-9
- 804 [38] Bouso, J.C., Palhano-Fontes, F., Rodríguez-Fornells, A., Ribeiro, S., Sanches, R.,  
805 Crippa, J.A.S., Hallak, J.E., Araujo, D.B., Riba, J. (2015). Long-term use of psychedelic  
806 drugs is associated with differences in brain structure and personality in humans. *Eur.*  
807 *Neuropsychopharmacol.* **25**. doi: 10.1016/j.euroneuro.2015.01.008.
- 808 [39] Halpern, J.H., Sherwood, A.R., Passie, T., Blackwell, K.C., Rutenber, A.J. (2008).  
809 Evidence of health and safety in American members of a religion who use a  
810 hallucinogenic sacrament. *Med. Sci. Monit.* **14**, SR15-SR22.
- 811 [40] Fábregas, J.M., González, D., Fondevila, S., Cutchet, M., Fernández, X., Barbosa,  
812 P.C.R., Alcázar-Córcoles, M.Á., Barbanoj, M.J., Bouso, J.C. (2010). Assessment of  
813 addiction severity among ritual users of ayahuasca. *Drug Alcohol Depend.* **111**. doi:  
814 10.1016/j.drugalcdep.2010.03.024
- 815 [41] Barbosa, P.C.R., Mizumoto, S., Bogenschutz, M.P., Strassman, R.J. (2012). Health  
816 status of ayahuasca users. *Drug Test Anal.* **4**. doi: 10.1002/dta.1383.
- 817 [42] Palhano-Fontes, F., Barreto, D., Onias, H., Andrade, K. C., Novaes, M., Pessoa, J.,  
818 Mota-Rolim, S., Osorio, F.L., Sanches, R., dos Santos, R., Tofoli, L., Silveira, G.,  
819 Yonamine, M., Riba, J., Santos, F.R.R., Silva-Junior, A.A., Alchieri, J., Galvão-Coelho,  
820 N., Lobao-Soares, B., Hallak, J., Arcoverde, E., Maia-de-Oliveira, J., Araujo, D.B.  
821 (2017). Rapid antidepressant effects of the psychedelic ayahuasca in treatment-resistant  
822 depression: a randomised placebo-controlled trial. *BioRxiv.* 103531. doi:  
823 <https://doi.org/10.1101/103531>
- 824 [43] Dos Santos, R.G., Valle, M., Bouso, J.C., Nomdedéu, J. F., Rodriguez-Espinosa, J.,  
825 McIlhenny, E.H., Barker, S.A., Barbanoj, M.J., Riba, J. (2011). Autonomic,  
826 Neuroendocrine, and Immunological Effects of Ayahuasca: a comparative study with d-  
827 amphetamine. *J. Clin. Psychopharmacol.* **31**. doi: 10.1097/JCP.0b013e31823607f6
- 828 [44] Conway, C.R., George, M.S., Sackeim, H.A. (2017). Toward an Evidence-Based,  
829 Operational Definition of Treatment-Resistant Depression: When Enough is Enough.  
830 *JAMA Psychiatry.* **74**. doi:10.1001/jamapsychiatry.2016.2586
- 831 [45] Maletic, V., Robinson, M., Oakes, T., Iyengar, S., Ball, S.G., Russell, J. (2007).  
832 Neurobiology of depression: an integrated view of key findings. *Int. J. Clin. Pract.* **61**.  
833 doi: 10.1111/j.1742-1241.2007.01602.x

- 834 [46] Vreeburg, S.A., Hoogendijk, W.J., DeRijk, R.H., van Dyck, R., Smit, J.H., Zitman,  
835 F.G., Penninx, B.W. (2013). Salivary cortisol levels and the 2-year course of depressive  
836 and anxiety disorders. *Psychoneuroendocrinology*. **38**. doi:  
837 10.1016/j.psycheneu.2012.12.017.
- 838 [47] Stetler, C., Miller, G.E. (2005). Blunted cortisol response to awakening in mild to  
839 moderate depression: regulatory influences of sleep patterns and social contacts. *J.*  
840 *Abnorm. Psychol.* **114**. doi: 10.1037/0021-843X.114.4.697
- 841 [48] Castro, M., Elias, L.L. (2003). Insuficiência adrenal crônica e aguda. *Medicina*  
842 *(Ribeirao Preto. Online)*. **36**. doi: 10.11606/issn.2176-7262.v36i2/4p375-379
- 843 [49] Gan, E.H., Pearce, S. H. (2017). MANAGEMENT OF ENDOCRINE DISEASE:  
844 Regenerative therapies in autoimmune Addison's disease (AAD). *Eur. J. Endocrinol.* **176**.  
845 doi: 10.1530/EJE-16-0581
- 846 [50] Wu, J.Y., Hsu, S.C., Ku, S.C, Ho, C.C, YU, C.J., Yang, P.C. (2008). Adrenal  
847 insufficiency in prolonged critical illness. *Crit. care*. **12**. doi:10.1186/cc6895
- 848 [51] Boonen, E., Van den Berghe, G. (2016). MECHANISMS IN ENDOCRINOLOGY:  
849 New concepts to further unravel adrenal insufficiency during critical illness. *Eur. J.*  
850 *Endocrinol.* **175**. doi: 10.1530/EJE-15-1098
- 851 [52] Wahbeh, H., Oken, B. S. (2013). Salivary cortisol lower in posttraumatic stress  
852 disorder. *J. Trauma. Stress*. **26**. doi:10.1002/jts.21798.
- 853 [53] Yehuda, R. (2002). Post-traumatic stress disorder. *N. Engl. J. Med.* **346**. doi:  
854 10.1056/NEJMra012941
- 855 [54] Nesse, R. M., S. Bhatnagar, and B. Ellis. (2016). "Evolutionary origins and functions  
856 of the stress response system," in *Handbook of Stress Academic Press, Amsterdam* 1:  
857 95e100.
- 858 [55] Dean, J., Keshavan, M. (2017). The neurobiology of depression: An integrated view.  
859 *Asian Journal of Psychiatry*. **27**. doi: doi.org/10.1016/j.ajp.2017.01.025
- 860 [56] Penninx, B.W., Milaneschi, Y., Lamers, F., Vogelzangs, N. (2013). Understanding  
861 the somatic consequences of depression: biological mechanisms and role of depression  
862 symptom profile. *BMC Med.* **11**. doi: 10.1186/1741-7015-11-129
- 863 [57] Pariante, C.M., Thomas, S.A., Lovestone, S., Makoff, A., Kerwin, R.W. (2004). Do  
864 antidepressants regulate how cortisol affects the brain? *Psychoneuroendocrinology*. **29**,  
865 423-447.
- 866 [58] Tu, M.T., Zunzunegui, M.V., Guerra, R., Alvarado, B., Guralnik, J.M. (2013).  
867 Cortisol profile and depressive symptoms in older adults residing in Brazil and in Canada.  
868 *Aging Clin. Exp. Res.* **25**. doi: 10.1007/s40520-013-0111-0
- 869 [59] Lefebvre, H., Thomas, M., Duparc, C., Bertherat, J., Louiset, E. (2016). Role of  
870 ACTH in the Interactive/Paracrine Regulation of Adrenal Steroid Secretion in  
871 Physiological and Pathophysiological Conditions. *Frontt. Endocrinol.* **7**. doi:  
872 10.3389/fendo.2016.00098
- 873 [60] Benton, C., and Wiltshire, T. (2011). "Biological alterations in depression", in T.  
874 Uehara, ed. *Psychiatric Disorders—Trends and Developments* (Intechopen, Croatia), 223-  
875 266.
- 876 [61] Tapia-Arancibia, L., Rage, F., Givalois, L., Arancibia, S. (2004). Physiology of  
877 BDNF: focus on hypothalamic function. *Front. Neuroendocrinol.* **25**. doi:  
878 10.1016/j.yfrne.2004.04.001
- 879 [62] Juruena, M.F., Cleare, A.J., Pariante, C.M. (2004). The hypothalamic pituitary  
880 adrenal axis, glucocorticoid receptor function and relevance to depression. *Rev. Bras.*  
881 *Psiquiatr.* **26**. doi: /S1516-44462004000300009



- 882 [63] Gray, J.D., Milner, T.A., McEwen, B.S. (2013). Dynamic plasticity: the role of  
883 glucocorticoids, brain-derived neurotrophic factor and other trophic factors.  
884 *Neuroscience*. **239**. doi: 10.1016/j.neuroscience.2012.08.034.
- 885 [64] Gold, P.W. (2015). The organization of the stress system and its dysregulation in  
886 depressive illness. *Mol. Psychiatry*. **20**. doi: 10.1038/mp.2014.163.
- 887 [65] Cooper, M. S., Stewart, P. M. (2003). Corticosteroid insufficiency in acutely ill  
888 patients. *N. Engl. J. Med.* **348**. doi: 10.1056/NEJMra020529
- 889 [66] Knowlton, A. I. (1989). Adrenal insufficiency in the intensive care setting. *J.*  
890 *Intensive Care Med.* **4**(1), 35-45.
- 891 [67] Annane, D., Maxime, V., Ibrahim, F., Alvarez, J. C., Abe, E., Boudou, P. (2006).  
892 Diagnosis of adrenal insufficiency in severe sepsis and septic shock. *Am. J. Respir. Crit.*  
893 *Care Med.* **174**. doi:10.1164/rccm.200509-1369OC
- 894 [68] Erturk, E., Jaffe, C.A., Barkan, A.L. (1998). Evaluation of the integrity of the  
895 hypothalamic-pituitary-adrenal axis by insulin hypoglycemia test. *J. Clin. Endocrinol.*  
896 *Metab.* **83**. doi:10.1210/jcem.83.7.4980
- 897 [69] Hägg, E., Asplund, K., Lithner, F. (1987). Value of basal plasma cortisol assays in  
898 the assessment of pituitary-adrenal insufficiency. *Clin Endocrinol (Oxf)*. **26**(2):221-6.
- 899 [70] Levine, A., Zagoory-Sharon, O., Feldman, R., Lewis, J. G., Weller, A. (2007).  
900 Measuring cortisol in human psychobiological studies. *Physiol. Behavior*. **90**. doi:  
901 10.1016/j.physbeh.2006.08.025
- 902 [71] Maes, M., Van Gastel, A., Blockx, P., Martin, M., Cosyns, P., Scharpé, S., Ranjan.  
903 R., Desnyder, R. (1996). Lower serum transcortin (CBG) in major depressed females:  
904 relationships with baseline and postdexamethasone cortisol values. *J. Affect. Disord.* **38**  
905 (1), 47-56.
- 906 [72] Callaway, J.C., McKenna, D.J., Grob, C.S., Brito, G.S., Raymon, L.P., Poland, R.  
907 E., Andrade, E.N., Andrade, E.O., Mash, D.C. (1999). Pharmacokinetics of Hoasca  
908 alkaloids in healthy humans. *J. Ethnopharmacol.* **65**, 243-256.
- 909 [73] dos Santos, R.G., Grasa, E., Valle, M., Ballester, M.R., Bouso, J.C., Nomdedéu, J.F.,  
910 Homs, R., Barbanøj, M.J., Riba, J. (2012). Pharmacology of ayahuasca administered in  
911 two repeated doses. *Psychopharmacology*. **219**. doi: [https://doi.org/10.1007/s00213-011-](https://doi.org/10.1007/s00213-011-2434-x)  
912 2434-x
- 913 [74] dos Santos, R.G. (2014). Immunological effects of ayahuasca in humans. *J.*  
914 *Psychoactive Drugs*. **46**. doi: <http://dx.doi.org/10.1080/02791072.2014.960113>
- 915 [75] Strassman, R.J., Qualls, C.R. (1994). Dose-response study of N, N-  
916 dimethyltryptamine in humans: I. Neuroendocrine, autonomic, and cardiovascular  
917 effects. *Arch. Gen Psychiatry*. **51**, 85-97.
- 918 [76] Passie, T., Seifert, J., Schneider, U., Emrich, H.M. (2002). The pharmacology of  
919 psilocybin. *Addict. Biol.* **7**. doi: 10.1080/1355621021000005937
- 920 [77] Hasler, F., Grimberg, U., Benz, M.A., Huber, T., Vollenweider, F.X. (2004). Acute  
921 psychological and physiological effects of psilocybin in healthy humans: a double-blind,  
922 placebo-controlled dose-effect study. *Psychopharmacology*. **172**. doi:  
923 <https://doi.org/1007/s00213-003-1640-6>
- 924 [78] Strajhar, P., Schmid, Y., Liakoni, E., Dolder, P.C., Rentsch, K.M., Kratschmar, D.V.,  
925 Odermatt, A., Liechti, M. E. (2016). Acute effects of lysergic acid diethylamide on  
926 circulating steroid levels in healthy subjects. *J. Neuroendocrinol.* **28**. doi:  
927 10.1111/jne.12374
- 928 [79] Hellhammer, D. H., Wüst, S., Kudielka, B. M. (2009). Salivary cortisol as a  
929 biomarker in stress research. *Psychoneuroendocrinol.* **34**. doi:  
930 10.1016/j.physbeh.2006.08.025

- 931 [80] Nater, U. M., Skoluda, N., Strahler, J. (2013). Biomarkers of stress in behavioural  
932 medicine. *Curr. Opin. Psychiatry*. **26**. doi: 10.1097/YCO.0b013e328363b4ed
- 933 [81] Fortunato, J. J., Réus, G. Z., Kirsch, T. R., Stringari, R. B., Fries, G. R., Kapczinski,  
934 F., Hallak, J.E, Zuardi, A.W., Crippa, J.A., Quevedo, J. (2010) Chronic administration of  
935 harmine elicits antidepressant-like effects and increases BDNF levels in rat hippocampus.  
936 *J. Neural Transm.* **117**. doi: 10.1007/s00702-010-0451-2
- 937 [82] Pic-Taylor, A., da Motta, L. G., de Moraes, J. A., Junior, W. M., Santos, A. D. F. A.,  
938 Campos, L. A., Mortari, M.R., von Zuben, M.V., Caldas, E. D. (2015). Behavioural and  
939 neurotoxic effects of ayahuasca infusion (*Banisteriopsis caapi* and *Psychotria viridis*) in  
940 female Wistar rat. *Behav Processes*. **118**. doi:10.1016/j.beproc.2015.05.004
- 941 [83] Silva, F.S, Silva, E.A.S., Junior, G.M.S., Maia-de-Oliveira, J.P., Rachetti, V.P.S.,  
942 Araujo, D.B., Sousa, M.B.C., Soares, B.L., Galvão-Coelho, N.L. (2018). Acute  
943 antidepressant effect of ayahuasca in juvenile non-human primate model of depression.  
944 *bioRxiv*. **254268**. doi: 10.1101/254268
- 945 [84] Galvão-Coelho, N. L., Galvão, A. C. D. M., Silva, F. S. D., Sousa, M. B. C. D.  
946 (2017). Common marmosets: a potential translational animal model of juvenile  
947 depression. *Front. Psychiatry*. **8**. doi: 10.3389/fpsyt.2017.00175
- 948 [85] Schüle, C., Baghai, T. C., Eser, D., Zwanzger, P., Jordan, M., Buechs, R., Rupprecht,  
949 R. (2006). Time course of hypothalamic-pituitary-adrenocortical axis activity during  
950 treatment with reboxetine and mirtazapine in depressed patients. *Psychopharmacol.* **186**.  
951 doi: 10.1007/s00213-006-0382-7
- 952 [86] Schüle, C. (2007). Neuroendocrinological mechanisms of actions of antidepressant  
953 drugs. *J. Neuroendocrinol.* **19**. doi: 10.1111/j.1365-2826.2006.01516.x
- 954 [87] Jørgensen, H. S. (2007). Studies on the neuroendocrine role of serotonin. *Dan. Med.*  
955 *Bull.* **54**(4), 266-288.
- 956 [88] Schuder, S. E. (2005). Stress-Induced Hypocortisolemia Diagnosed as Psychiatric  
957 Disorders Responsive to Hydrocortisone Replacement. *Ann. N. Y. Acad. Sci.* **1057**. doi:  
958 10.1196/annals.1356.036
- 959 [89] Sapolsky, R. M., Romero, L. M., Munck, A. U. (2000). How do glucocorticoids  
960 influence stress responses? Integrating permissive, suppressive, stimulatory, and  
961 preparative actions. *Endocr. Rev.* **21**. doi: 10.1210/edrv.21.1.0389
- 962 [90] Campeau, S., Liberzon, I., Morilak, D., Ressler, K. (2011). Stress modulation of  
963 cognitive and affective processes. *Stress*. **14**. doi: 10.3109/10253890.2011.596864
- 964 [91] Harris, T. O., Borsanyi, S., Messari, S., Stanford, K., Brown, G. W., Cleary, S. E.,  
965 Shiers, H.M., Herbert, J. (2000). Morning cortisol as a risk factor for subsequent major  
966 depressive disorder in adult women. *Br. J. Psychiatry*. **177**. doi: 10.1192/bjp.177.6.505
- 967 [92] Adam, E. K., Doane, L. D., Zinbarg, R. E., Mineka, S., Craske, M. G., Griffith, J.  
968 W. (2010). Prospective prediction of major depressive disorder from cortisol awakening  
969 responses in adolescence. *Psychoneuroendocrinol.* **35**.  
970 doi:10.1016/j.psyneuen.2009.12.007
- 971 [93] Chan, M.K., Cooper, J.D., Bot, M., Steiner, J., Penninx, B.W.J.H., Bahn, S. (2016).  
972 Identification of an immune-neuroendocrine biomarker panel for detection of depression:  
973 a joint effects statistical approach. *Neuroendocrinol.* **103**. doi: 10.1159/000442208
